# Supplementary material for: Dietary Choices and Habits during COVID-19 Lockdown: Experience from Poland
Source: PubMed Central journal article supplement (PMC7352682; doi:10.3390/nu12061657), 2020-06-03
Supplement: nutrients-12-01657-s001.pdf [file nutrients-12-01657-s001.pdf]

**Did you consume more food than usual during quarantine?**

- a) decidedly yes b) yes c) hard to decide d) no e) decidedly no

**Please indicate the number of meals eaten per day during quarantine:**

- a) one b) two c) three d) four e) five f) six or more

**Did you snack more frequently than usual during quarantine?**

- a) decidedly yes b) yes c) hard to decide d) no e) decidedly no **Please indicate the number of snacks eaten per day during quarantine:**

- a) none b) one c) two d) three e) four or more

**Did you cook more often than usual during quarantine?**

- a) decidedly yes b) yes c) hard to decide d) no e) decidedly no

**How often did you eat breakfast during quarantine?**

- a) every day b) almost every day c) sometimes d) practically never e) never

**Please estimate the frequency of consumption of particular foods during COVID-19 quarantine:**

|                       | >1 per day | Once per day | Few times per week | Once per week | Once per month | Occasionally | Never |
|-----------------------|------------|--------------|--------------------|---------------|----------------|--------------|-------|
| Vegetables and fruits |            |              |                    |               |                |              |       |
| Legumes               |            |              |                    |               |                |              |       |
| Grain products        |            |              |                    |               |                |              |       |
| Meat products         |            |              |                    |               |                |              |       |
| Dairy                 |            |              |                    |               |                |              |       |
| Fast-foods            |            |              |                    |               |                |              |       |
| Instant products      |            |              |                    |               |                |              |       |
| Sweets                |            |              |                    |               |                |              |       |
| Salty snacks          |            |              |                    |               |                |              |       |
| Coffee                |            |              |                    |               |                |              |       |
| Tea                   |            |              |                    |               |                |              |       |

**Did you notice any changes in your body weight during quarantine?**

a) weight increase b) weight loss c) no change in weight d) did not measure weight

**If you noticed any changes in your body weight during quarantine, please indicate the estimated difference (in kg): ....**

**Do you smoke cigarettes?**

a) yes b) no

**If so, did you observe a tendency to smoke more during quarantine?**

a) decidedly yes b) yes c) hard to decide d) no e) decidedly no

**Did you drink more alcohol during quarantine?**

a) decidedly yes b) yes c) hard to decide d) no e) decidedly no

**Are you addicted to alcohol?**

a) yes b) no

**Please indicate whether you fear contracting coronavirus during grocery shopping?**

a) decidedly yes b) yes c) hard to decide d) no e) decidedly no

**Please indicate whether you fear contracting coronavirus when having direct contact with food?**

a) decidedly yes b) yes c) hard to decide d) no e) decidedly no

**Please indicate which of the following describes you best during COVID-19 quarantine:**

a) I work full-time remotely b) I work with no changes, not remotely c) I am a university student d) I am unemployed e) I work regularly

**Your age (in years): ...**

**Your weight (in kg): ....**

**Your height (in cm): ....**

**Your gender:**

a) female b) male

**Your place of living:**

a) urban  $\geq$ 250,000 residents b) urban 50,000–200,000 residents c) Urban 50,000–100,000 residents d) urban < 50,000 residents e) rural area

**Your education level:**

a) primary b) secondary c) tertiary d) vocational
